# Supplementary material for: Versatile and Accessible Magnetic Diagnosis Platform with Different Types of Magnetic Particles for Liquid and Solid Biopsies
Source: Int J Mol Sci. 2023 Jun 20;24(12):10363. doi: 10.3390/ijms241210363 (PMC10299023; doi:10.3390/ijms241210363)
Supplement: Supplementary file 1 [file ijms-24-10363-s001.zip › ijms-2394689-supplementary.pdf]

## Supplemental Materials

The software COMSOL for Multiphysics Simulation was used to replicate the  $H$  variation with the rotations of three magnetic rings (Figure S1a) and the pressure variation with acoustic propagation after its generation from the top planar (Figure S1b).

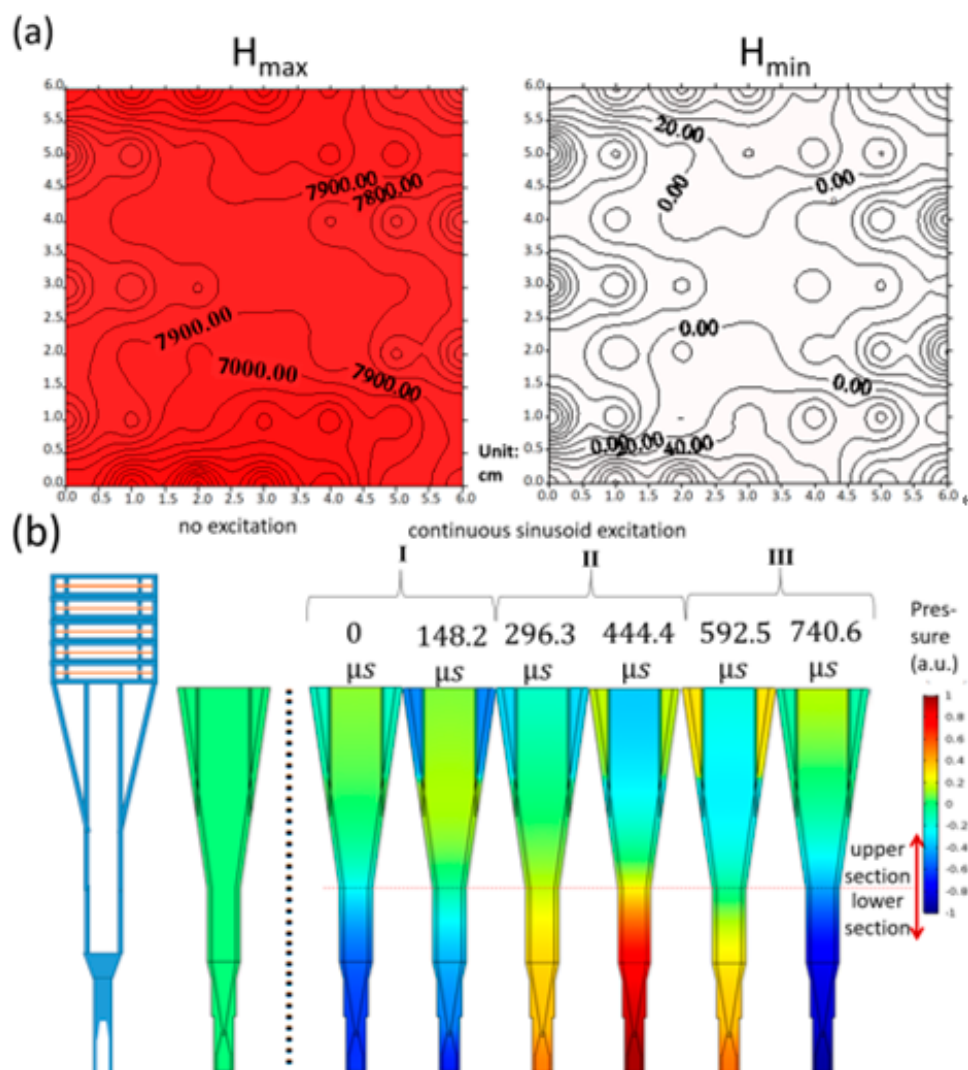

**Figure S1.** Simulated data of magnetic and acoustic excitation devices: (a) uniform magnetic field of  $H_{\min}$  and  $H_{\max}$  at the sample region between the pair of pickup coils; (b) acoustic vibrator and simulation of acoustic wave propagation
